# Supplementary material for: Plasmonic and Conductive Structures of TCO Films with Embedded Cu Nanoparticles
Source: MDPI journal article supplement (doi:10.3390/ijms231911886), 2022-10-06
Supplement: s1 [file s1]

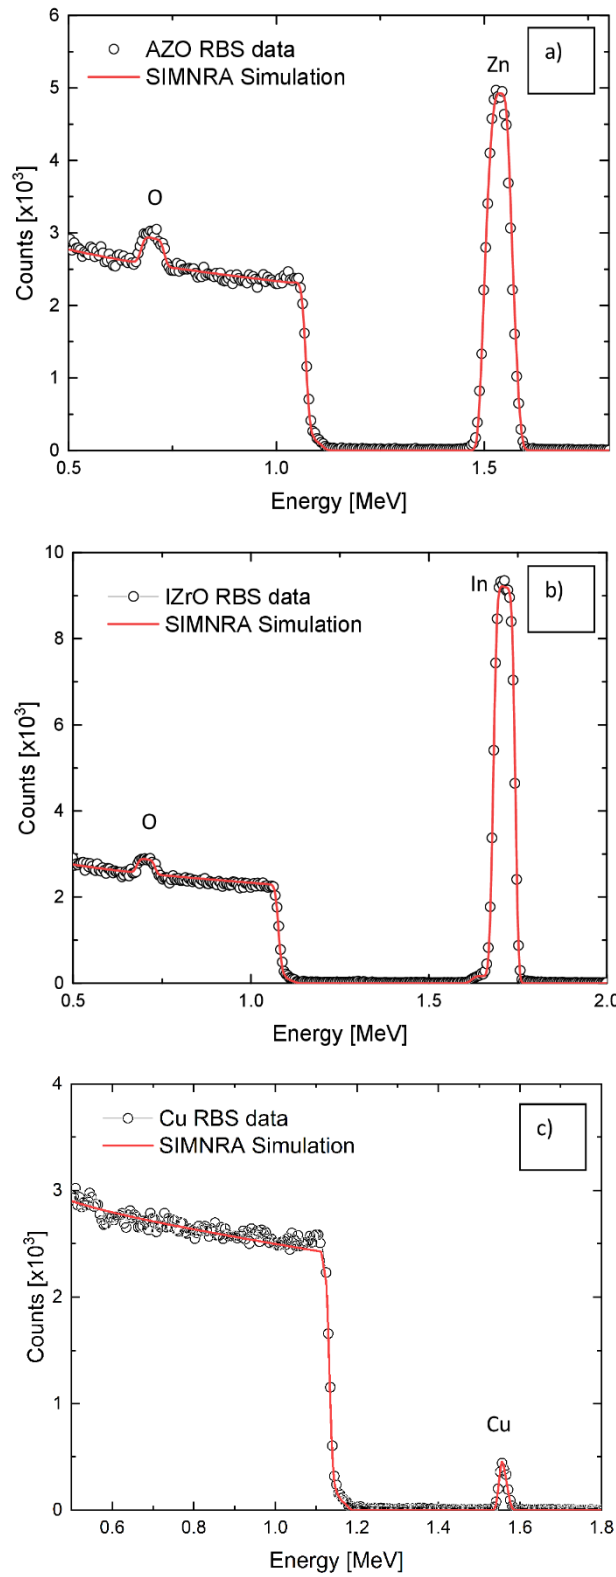

Figura S1: RBS extended experimental Spectra and Simulated curves with SimnNra software for a) AZO; b) IZrO; c) Cu thin films on Silicon substrate.
